# Supplementary material for: Adult Influence on Juvenile Phenotypes by Stage-Specific Pheromone Production
Source: PubMed Central journal article supplement (PMC6279967; doi:10.1016/j.isci.2018.11.027), 2018-11-20
Supplement: mmc1.pdf [file mmc1.pdf]

**ISCI, Volume 10**

**Supplemental Information**

**Adult Influence on Juvenile Phenotypes  
by Stage-Specific Pheromone Production**

**Michael S. Werner, Marc H. Claßen, Tess Renahan, Mohannad Dardiry, and Ralf J. Sommer**

1  
2  
3  
4  
5  
6  
7  
8  
9  
10  
11  
12  
13  
14  
15  
16  
17  
18  
19  
20  
21  
22  
23  
24

## Supplemental Information

### Transparent Methods

#### Nematode strains and husbandry

*P. pacificus* Wild-type RS2333 (California) and RSC017 (La Réunion) strains were kept on 6 cm nematode growth media (NGM) plates seeded with OP50 and kept at 20°C. RSC017 is highly St and does not predate on other nematodes, and thus was used for biological assays instead of the highly Eu, predatory RS2333. To induce dauer, mixed-stage plates with little to no OP50 were washed with M9 and the resulting worm pellets were used in a modified 'White Trap' method. Worm pellets were placed on killed *Tenebrio molitor* grubs and dispersing dauers were collected in surrounding MilliQ water. Age of dauers ranged from one week to one month.

#### Dye staining

A stock solution of Neutral Red was prepared by dissolving 0.5 mg in 10 ml 5% acetic acid and stored at -20°C. Working solutions were prepared by 100x dilution in M9, aliquoted, stored at -20°C, and thawed directly before use. Working solutions were kept for approximately 1 month. Stock solutions of 10 mM CellTracker Green BODIPY were made in DMSO and stored at -20°C. J2s were prepared from 20-40 x 6 cm plates 6 days after passaging 5 worms to each plate on 300 µl OP50. Worms were washed from plates with M9 into a conical tube, and then filtered through 2 x 20 µM filters (Millipore) placed between rubber gaskets. The flow-through contained mostly J2 and some J3, which were pelleted by centrifugation, 8 seconds on a table-top eppendorf centrifuge 5424, reaching approximately 10,000 x g. The older/larger adult worms

25 remained on the filters, and were washed into a 50 ml conical tube with ~2 ml M9. Adults were  
26 then isolated by transferring worms to a 15 ml conical, and allowing them to swim/sink to the  
27 bottom of the tube. Adults reach the bottom faster than younger stages do, and after 3-5 rounds  
28 of removing supernatant and re-suspending in 2-3 ml M9, the pellet contains almost exclusively  
29 adults, which were re-suspended in 1 ml M9/50  $\mu$ M Green BODIPY (Thermo Fisher). The J2  
30 pellet was either directly re-suspended in 1 ml Neutral Red working solution, or in 1 ml M9 and  
31 split to two tubes, re-centrifuged, and re-suspended in 1 ml working solution Neutral Red  
32 (0.005% in M9) or 1 ml M9/50  $\mu$ M Green BODIPY (Thermo Fisher). For the intermediate time  
33 point juveniles (J3s and some J4s), J2s isolated from 20  $\mu$ M filtering were placed back on agar  
34 plates containing 300  $\mu$ l OP50 bacterial food and grown for another 24 hours, and then washed  
35 from plates in M9 and re-filtered through 5  $\mu$ M filters, then re-suspended in 1 ml 50  $\mu$ M Green  
36 BODIPY (Thermo Fisher). Each tube was rotated for 3 hours in the dark at 20°C, then washed  
37 by centrifugation as before, and re-suspended in 1 ml M9. This was repeated 3-4x until the dye  
38 was no longer visible in the worm pellet. Then, the concentration of worms per microliter was  
39 determined by aliquoting 2  $\mu$ l onto a glass coverslip in 5 technical replicates, and counted under  
40 a dissecting microscope. Finally the appropriate number of animals was added to 6 cm plates  
41 that had been previously seeded with 300  $\mu$ l OP50, and incubated at 20°C. After 3 days, 100%  
42 of worms exhibited Neutral Red staining ( $n=50$ , Supplementary Figure 3). Dauers and J2s  
43 recovered after Neutral Red staining developed at the same developmental speed (3-4 days)  
44 and with the same mouth-form ratio as control worms recovered side-by-side (100% St for both,  
45 Supplementary Figure 4,  $n=30$ ). Dauers and J2s stained with CellTracker Green BODIPY (50  
46  $\mu$ M) (Thermo) were similar, although less efficiently stained compared to Neutral Red. On day 4,  
47 90% retained intestinal fluorescence (Supplementary Figure 3), and brightness decreased with  
48 the number of days. J2s in +/- 50  $\mu$ M CellTracker Green BODIPY also developed at equivalent  
49 rates and mouth-form ratios (Supplementary Figure 4). Lower than 25  $\mu$ M did not yield strongly

50 fluorescent worms after three hours. CellTracker Blue CMAC (Thermo Fisher) was also used at  
51 50  $\mu$ M and imaged 3 days post-staining for *P. pacificus*, and one day post-staining for *C.*  
52 *elegans*. However, due to the higher fluorescent background in the blue light spectrum in both  
53 *P. pacificus* and *C. elegans*, we performed all experiments using only Neutral Red and  
54 CellTracker Green BODIPY.

55

## 56 **Microscopy**

57 All images were taken on a Zeiss Axio Imager 2 with an Axiocam 506 mono, and processed  
58 using Zen2 pro software. Image brightness and contrast were enhanced in ImageJ with a  
59 minimum displayed value of 10 and maximum of 100 for all images in Figure 2, and  
60 Supplementary Figures 1 and 2, and a minimum of 21 and maximum of 117 for Supplementary  
61 Figure 3. The following exposure times were used for all images: Cy3 (peak emission = 561,  
62 exposure = 80 ms), FITC (peak emission = 519, exposure = 150 ms), Dapi (peak emission =  
63 465, exposure = 80 ms), DIC (exposure = 80-140 ms).

64

## 65 **Mixed culture experiments and statistical analysis**

66 We performed the mixed culture experiments presented in Figure 3 with a minimum total  
67 number of counts  $n > 100$ , from three to five independent biological replicates for J2/24 hr,  
68 dauer, and adult competitor experiments, and two for the intermediate (J3/4) juvenile  
69 experiment (median counts per replicate for J2/24 hr=29, dauers=27, and adults=21, and avg.  
70 J3/4 counts was 75). J2 or dauers were stained with Neutral Red, then added to green-stained  
71 J2, dauer, J3/4, or adult populations as described in the 'Dye Staining' method section, on 6 cm  
72 plates with 300  $\mu$ l OP50 and incubated at 20°C. To ensure consistent bacterial food supply, we  
73 added 1 ml more overnight OP50-LB to each plate on the following day, then air-dried under a  
74 chemical fume hood for 1 hour, then returned the plates to 20°C. On days three to four, we

75 phenotyped 'red' adults that exhibited no 'green' staining. To assess whether the age of the  
76 'green' surrounding population affects the mouth form of the dependent variable 'red' J2s we  
77 performed a binomial regression on Eu counts (i.e. "successes") weighted by the number of  
78 counts per replicate, and the stage (juveniles vs. adults) and number added as a fixed effects,  
79 using a generalized linear model from the standard statistical package in R:

```
80 glm(formula=cbind(Eu,total)~'stage_added' * '#_added', data='J2/Da', family="binomial")
```

81 See Supplementary Table S1 for a table containing the resulting  $p$  values. The AIC for our  
82 models (85.52 for juveniles and 72.32 for dauers) was substantially lower than the null  
83 hypothesis (220.16 for J2s and 147.29 for dauers), arguing a reasonable fit. For pair-wise  
84 comparisons of the effect of age for a given number of added animals, we performed a post-hoc  
85 Fisher's exact test on a contingency table containing the summed counts ( $n > 100$ ) of Eu and St  
86 observations against control plates (no added crowding animals). For display, we converted Eu  
87 counts into percent of total in Figure 3, with the  $p$  values for the number of animals added  
88 indicated over the relevant column (Significance codes: 0 '\*\*\*\*' 0.001, '\*\*' 0.01, '\*' 0.05).

89

### 90 **Measuring the effect of food depletion on mouth form**

91 To verify that starvation was not a factor in our mixed culture experiments, we added increasing  
92 number of J2s to standard 6 cm plates with 300  $\mu$ l OP50 to rapidly consume bacterial food, and  
93 measured both the amount of animals that reached adulthood, and the percent Eu in each  
94 population for two biological replicates. To assess the affects of added J2s to each dependent  
95 variable we performed a binomial regression with count data weighted by the total number of  
96 counts for each replicate:

```
97 glm(formula = cbind(reached_adult, total)~thousand_J2s, data=data_2, family="binomial")
```

98  $p$  values indicate a significant difference in percent reaching adult as a function of J2s added,  
99 but not in percent Eu (Table S1 bottom frame).

100

101 **Supernatant collection and assays**

102 Strains RS2333, RSC017, and RS2333-*daf-22.1;22.2* were raised in 10 ml liquid culture as in  
103 the time-resolved NDMM collections (see below). For each time point, 9 ml of the supernatant  
104 was lyophilized overnight, extracted again overnight with 90% ethanol (diluted in Millipore water)  
105 while being stirred, and centrifuged (4000 x g, 10 min, 4°C). The solvent was evaporated and  
106 the solid re-dissolved with 1 ml Millipore water. This clear extract was then directly used for the  
107 assays. One ml of the supernatant was cleaned for HPLC-MS analysis for quality control, as  
108 described in HPLC-MS sample preparation below. For the assays, RSC017 was synchronized  
109 by bleaching (Werner et al., 2017) and added to plates seeded with 300 µl OP50. The  
110 supernatants were added to the RSC017 J2s in two 500 µl increments (for a total of 1 ml  
111 supernatant) and dried for 30 minutes in a sterile hood after each addition. Plates were kept at  
112 20°C and adult mouth forms were screened three days later. To determine significance a Fisher  
113 Exact test was performed on summed count data relative to S-medium control contingency  
114 tables, and the data are presented for representation as percentages in Figure 4.

115

116 **HPLC-MS sample preparation for exo-metabolome and time resolved analysis**

117 To collect staged pheromone profiles, we seeded 35 x 6 cm plates with 5 worms each, and  
118 bleached 5-6 days later when gravid to collect eggs/J1s. These were then added to 6 x 10 ml  
119 flasks with OP50 as described in Werner et al., 2017 (Werner et al., 2017). Then at 24, 48, or 72  
120 hr time intervals, supernatants were obtained by centrifugation (>4,000 x g, 4°C for 10 minutes).  
121 1 ml supernatant was adsorbed onto a SPE-C8 cartridge (Thermo Scientific Hypersep C8 100  
122 mg/1ml), conditioned with 1 ml MeOH followed by 2 ml Millipore water. The adsorbed material  
123 was then washed with 200 µl water and subsequently eluted with 200 µl MeOH. This extract  
124 was then measured directly via HPLC-qTof MS (Bruker ImpactII).

125

126 **HPLC-MS measurement**

127 20 µl extract was injected into a Thermo UltiMate 3000 HPLC equipped with a Sigma-Aldrich  
128 Ascentis Express C18 2.7 µm 10 mm x 4.6 mm column at 20°C with a flow of 500 µl/min. All MS  
129 measurements have been performed in negative ion mode and molecules are detected as [M-  
130 H]<sup>-</sup> ions. The solvent gradient started with 5% acetonitrile (ACN)/ 95% water (both containing  
131 0.1% formic acid) for 2 minutes. After this equilibration step, the ACN proportion was increased  
132 to 65% over 8 min, then to 100% ACN in 1.2 minutes followed by a hold step for 8.8 minutes.  
133 Afterwards, the system was flushed to 5% ACN with 2 minutes equilibration for a total of 22  
134 minutes. For calibration, a sodium formate cluster building solution was automatically injected in  
135 the first 2 minutes of each run. Data analysis was performed with TASQ version 1.0 from Bruker  
136 Daltonics. Extracted ion chromatograms for each well-known compound with a mass width of  
137 0.1 m/z and time slices of 0.5 minutes around the expected retention time were produced after  
138 calibrating and baseline correction. Assignment errors were corrected with the provided MRSQ  
139 value, and areas under the curve were calculated from the integral of each peak.

140

141 **Statistical analysis of NDMMs**

142 NDMM levels were compared simultaneously against strains and developmental stages by a  
143 linear model in R: `lm('NDMM' ~ 'developmental stage' * 'strain', data='data.frame')`). In essence,  
144 the linear model regressed the abundance of NDMMs against stage and strain as fixed effects.  
145 *P* values between stages and strains were adjusted for multiple testing by a false discovery rate  
146 correction (FDR). The level of fit between linear vs. exponential growth was determined by the  
147 Akaike information criterion (AIC). The lowest AIC for iterations of different exponents  
148 ( $n=1,2,3,\dots$ ) was used for comparison to the simple linear model. While significant in both cases,  
149 for consistency we present the original *p* values from the original linear model in Table S2.

150 **Supplemental Figure Legends**

151

152 **Figure S1, related to Figure 2. Vital dye staining of *Pristionchus pacificus*.**

153 (A) Control *P. pacificus* imaged with Cy3, FITC, and DAPI filters, and a merge with Differential  
154 Interference Contrast (DIC). Histogram on the right represents quantification of intensity with  
155 each filter. (B) Same as (A) but stained with 0.005% Neutral Red, (C), 50  $\mu$ M CellTracker Green  
156 BODIPY (Thermo Fisher), or (D) 50  $\mu$ M CellTracker Blue CMAC Dye (Thermo Fisher). J2s were  
157 stained (see Transparent Methods), and ensuing adult animals were imaged 3 days later on a  
158 Zeiss Axio Imager 2 with an AxioCam 506 mono, and processed using Zen2 pro software.  
159 Image brightness and contrast were enhanced in ImageJ for display, with a minimum displayed  
160 value of 10 and maximum of 100 for all images. Note that while Neutral Red and CellTracker  
161 Green staining are bright and specific to their respective channels, CellTracker Blue is  
162 indistinguishable from background fluorescence.

163

164 **Figure S2, related to Figure 2. Vital dye staining of *Caenorhabditis elegans*.**

165 (A-D) Same as Supplementary Figure 1, but with *C. elegans*.

166

167 **Figure S3, related to Figure 2. Vital dye staining of *P. pacificus* dauers, and duration of**

168 **staining.** (A) Control *P. pacificus* dauer imaged with DIC, Cy3, and FITC filters. (B) Dauers  
169 stained with either 0.005% Neutral Red or 50  $\mu$ M CellTracker Green BODIPY and imaged  
170 immediately after staining with DIC, Cy3, and FITC filters and merged with DIC. Images were  
171 taken using Zeiss Axio Imager 2 with an AxioCam 506 mono, processed using Zen2pro  
172 software, and adjusted in ImageJ, with a display value minimum of 21 and maximum of 117.



173 (C-G) 50  $\mu$ M CellTracker Green BODIPY and 0.005% Neutral Red-stained J2s were imaged  
174 every day for five days. Percent of individuals retaining the dyes are shown in panels next to  
175 each microscope image for each day. Both stains are seen in all organisms for three days;  
176 Neutral Red (NR) persists for at least five, while the number of Green BODIPY (GB) –stained  
177 worms drops on day four. All images are merged with DIC, n=31 GB, 63 NR day 1, 68 GB, 56  
178 NR day 2, 50 GB, 50 NR day 3, 50 GB, 50 NR day 4, 50 GB, 50 NR day 5.

179

180 **Figure S4, related to Figure 2. Vital dye staining does not affect *P. pacificus* mouth form**  
181 **or development.**

182 (A) Neutral Red and CellTracker Green BODIPY-stained J2s reach adulthood at the same  
183 rate as unstained J2s (3 days). (B) All of the J2s stained retain the dye in adulthood in the  
184 intestine. (C) Neither dye affects mouth form; both unstained and stained worms remain  
185 100% St (n=30). (D-F) Same as for (A-C) except with dauers instead of J2s, and only with  
186 Neutral Red. (G) Developmental rate of J2 unstained, Neutral Red-stained (NR), and  
187 CellTracker Green BODIPY-stained (GB) RSC017 every 12 hours post-J2 staining. Two  
188 biological replicates, n=60. To see if there were significant differences between stained  
189 and un-stained, a Fisher's Exact test was performed on summed counts of each stage (all  
190  $p > 0.05$ ) (H) Staging of RSC017 worms from liquid culture at the relevant time points, 24  
191 hrs, 48 hrs, and 72 hrs. Error bars represent standard error of the mean for 3 biological  
192 replicates, n>100 animals counted per replicate.

193

194 **Table S1, related to Figure 3. Table of binomial regression *p* values for crowding assays.**

195 Significance *p* values from binomial regression of vital-dye method for age and number added,  
196 and from binomial regression of number-reaching-adult and Eu counts, for each number of  
197 individuals added relative to 1,000 individuals added (see Transparent Methods for details).

198

199 **Figure S5, related to Figure 5. Pheromone profiling quality control.**

200 (A) Extracted ion traces (width 0.1 m/z) of 11 of the 12 NDMMs used in this publication from a  
201 seven-day mixed-stage sample, double peak of 247.12 m/z indicate isomeric structures  
202 (Part#9/Ascr#9). (B) Example of an averaged spectrum over a calibration segment; sodium-  
203 formate cluster building solution was used to ensure high mass accuracy in each run. (C)  
204 Comparison of an endometabolome sample from a seven- day mixed-stage cultured compared  
205 to the endometabolome of eggs, produced by using bleached eggs from 80 x 60 mm plates.

206

207 **Table S2, related to Figure 5. Table of linear regression  $p$  values with FDR corrections for**  
208 **strain and stage comparison of NDMM levels.** FDR-corrected and uncorrected  $p$  values from  
209 linear regression of *P. pacificus* NDMMs (alternating grey background between NDMMs for  
210 clarity). Red values indicate FDR<0.05.

211

212 **Table S3, related to Figure 5. P values from pairwise comparison of dasc#1, npar#1, and**  
213 **ascr#9 throughout development.** Significance assessed with a two-tailed student's  $t$ -test. Top  
214 table indicates comparison of raw pheromone levels experienced by worms, and the bottom  
215 table indicates comparison of volume-normalized pheromone levels (normalized data from  
216 WormSizer (Moore et al., 2013), Fig. S6B-D).

217

218 **Figure S6, related to Figure 5. Enzyme that synthesizes NDMMs is transcriptionally**  
219 **regulated during development, and volume normalization of pheromones.** (A) Comparison  
220 of *daf-22.1* (FPKM) by RNA-seq through different stages of development, data from Baskaran et  
221 al., 2015 (Baskaran et al., 2015). A two-sided students  $t$ -test was performed between 56-68

222 hours (J4-adults) and 22 hours (J2s) (Significance codes: 0 '\*\*\*' 0.001, '\*\*' 0.01, '\*' 0.05). (B)  
223 Representative images of worms raised in liquid culture at 24 hrs, 48 hrs, and 72 hrs. (C)  
224 Comparison of worm volumes (picoLiters) for 24 hrs, 48hrs, and 72 hrs, using WormSizer  
225 (Moore et al., 2013). (D) Time-resolved NDMM levels of RSC017 normalized by worm volume  
226 (upper graph) and unnormalized (lower graph, also shown in Figure 5B). Data is presented as  
227 the mean of nine biological replicates and error bars represent standard error of the mean  
228 (SEM). In the upper graph, levels were normalized to worm volume based on the data shown in  
229 (C).

230

231 **Table S4, related to Figure 5. Raw and volume-normalized data of RSC017 pheromones,**  
232 **in absolute value of area under the curve.** Normalization of 48 hr and 72 hr time point  
233 abundances relative to 24 hrs. Average volumes obtained by WormSizer (Moore et al.,  
234 2013)(Figure S6B-C).

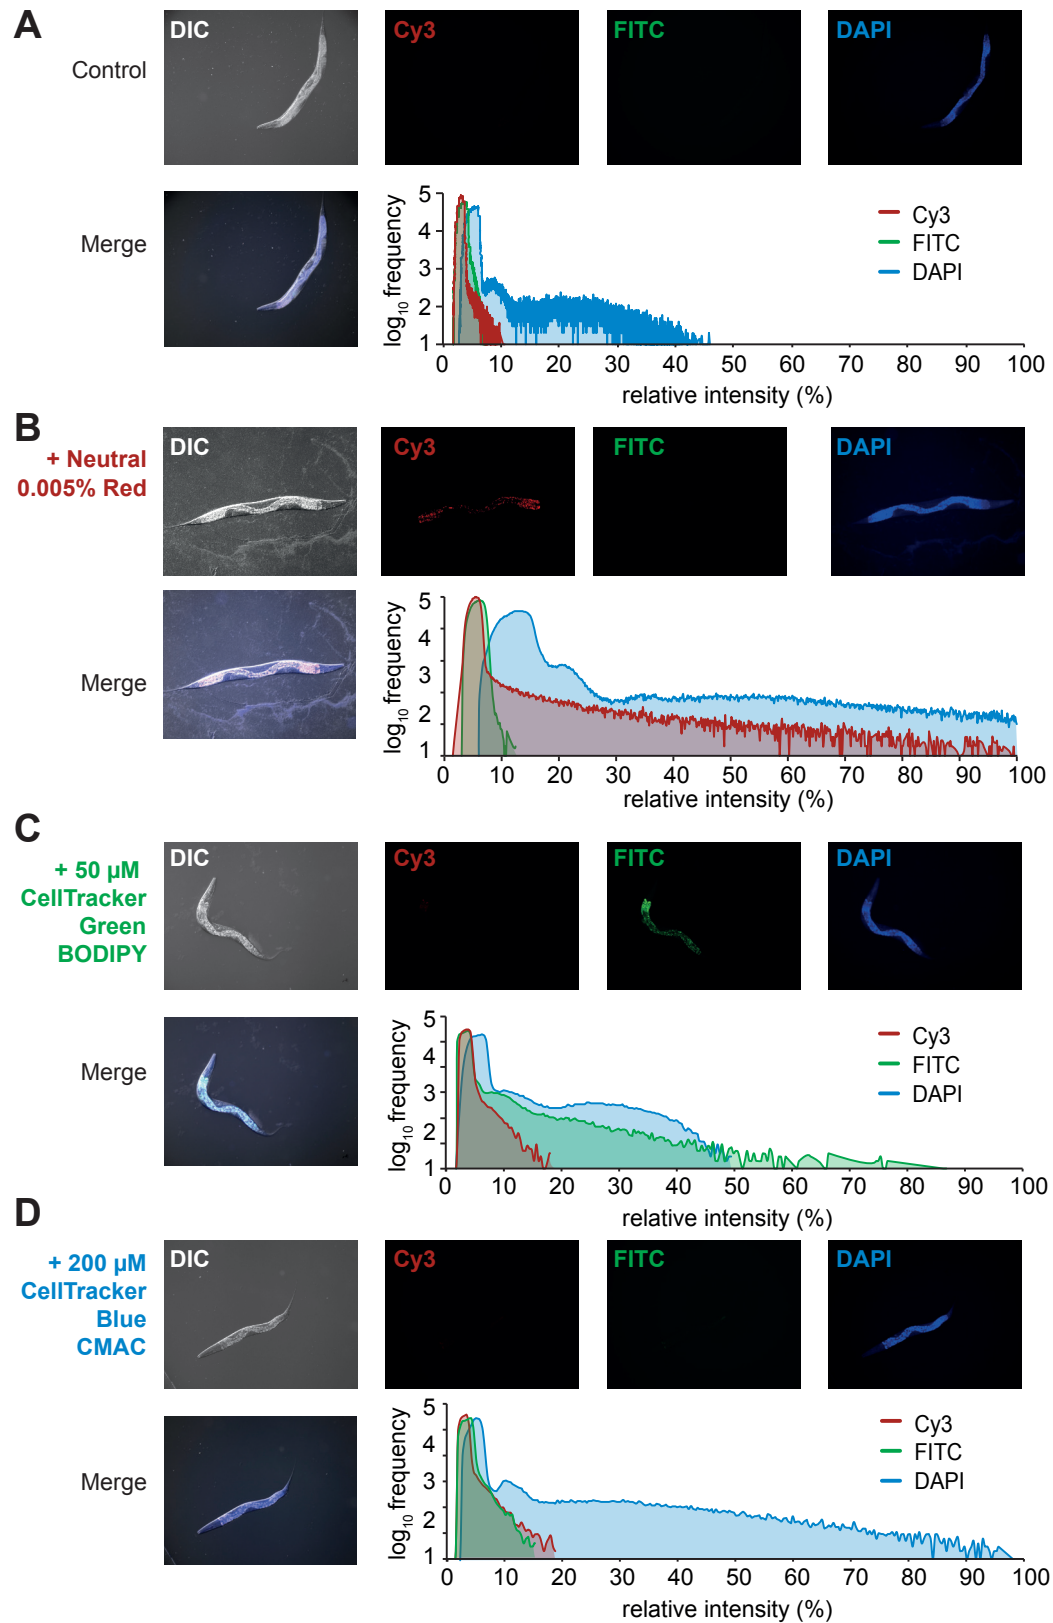

**Figure S1, related to Figure 2. Vital dye staining of *Pristionchus pacificus*.**

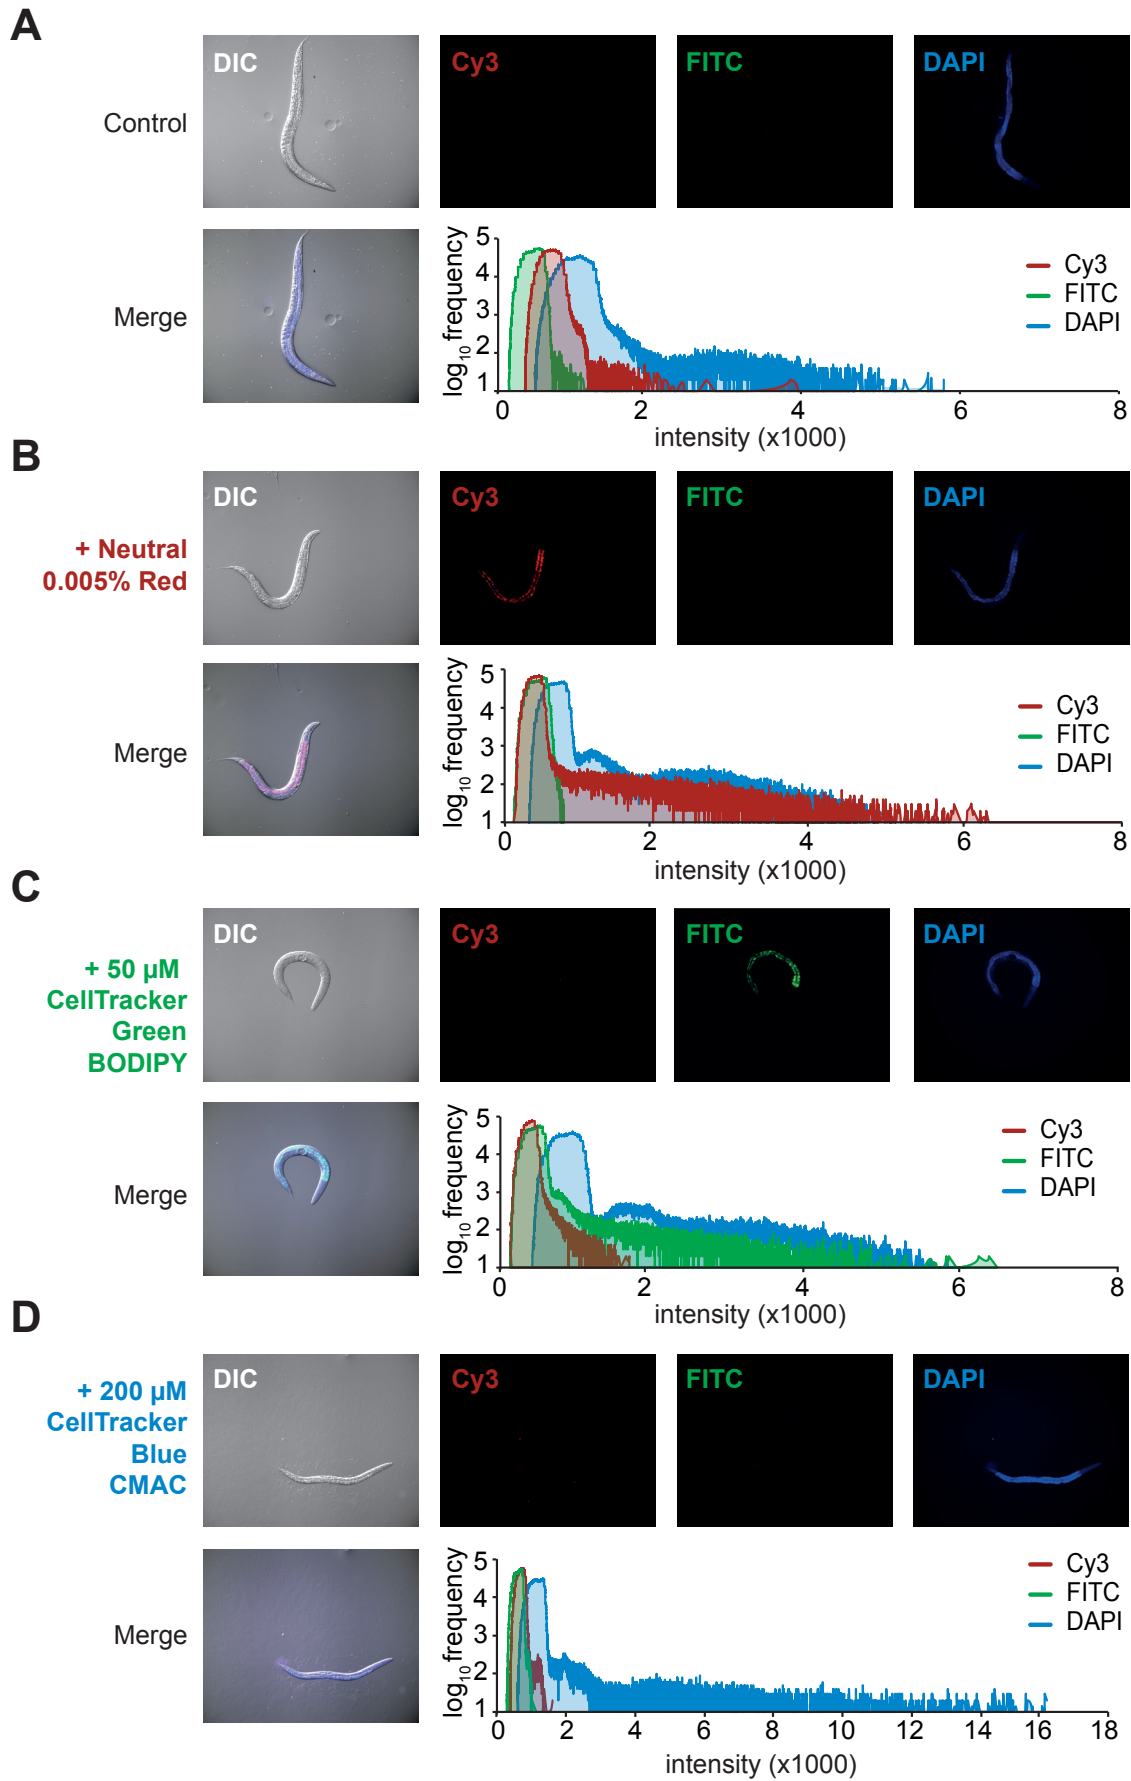

Figure S2, related to Figure 2. Vital dye staining of *Caenorhabditis elegans*.

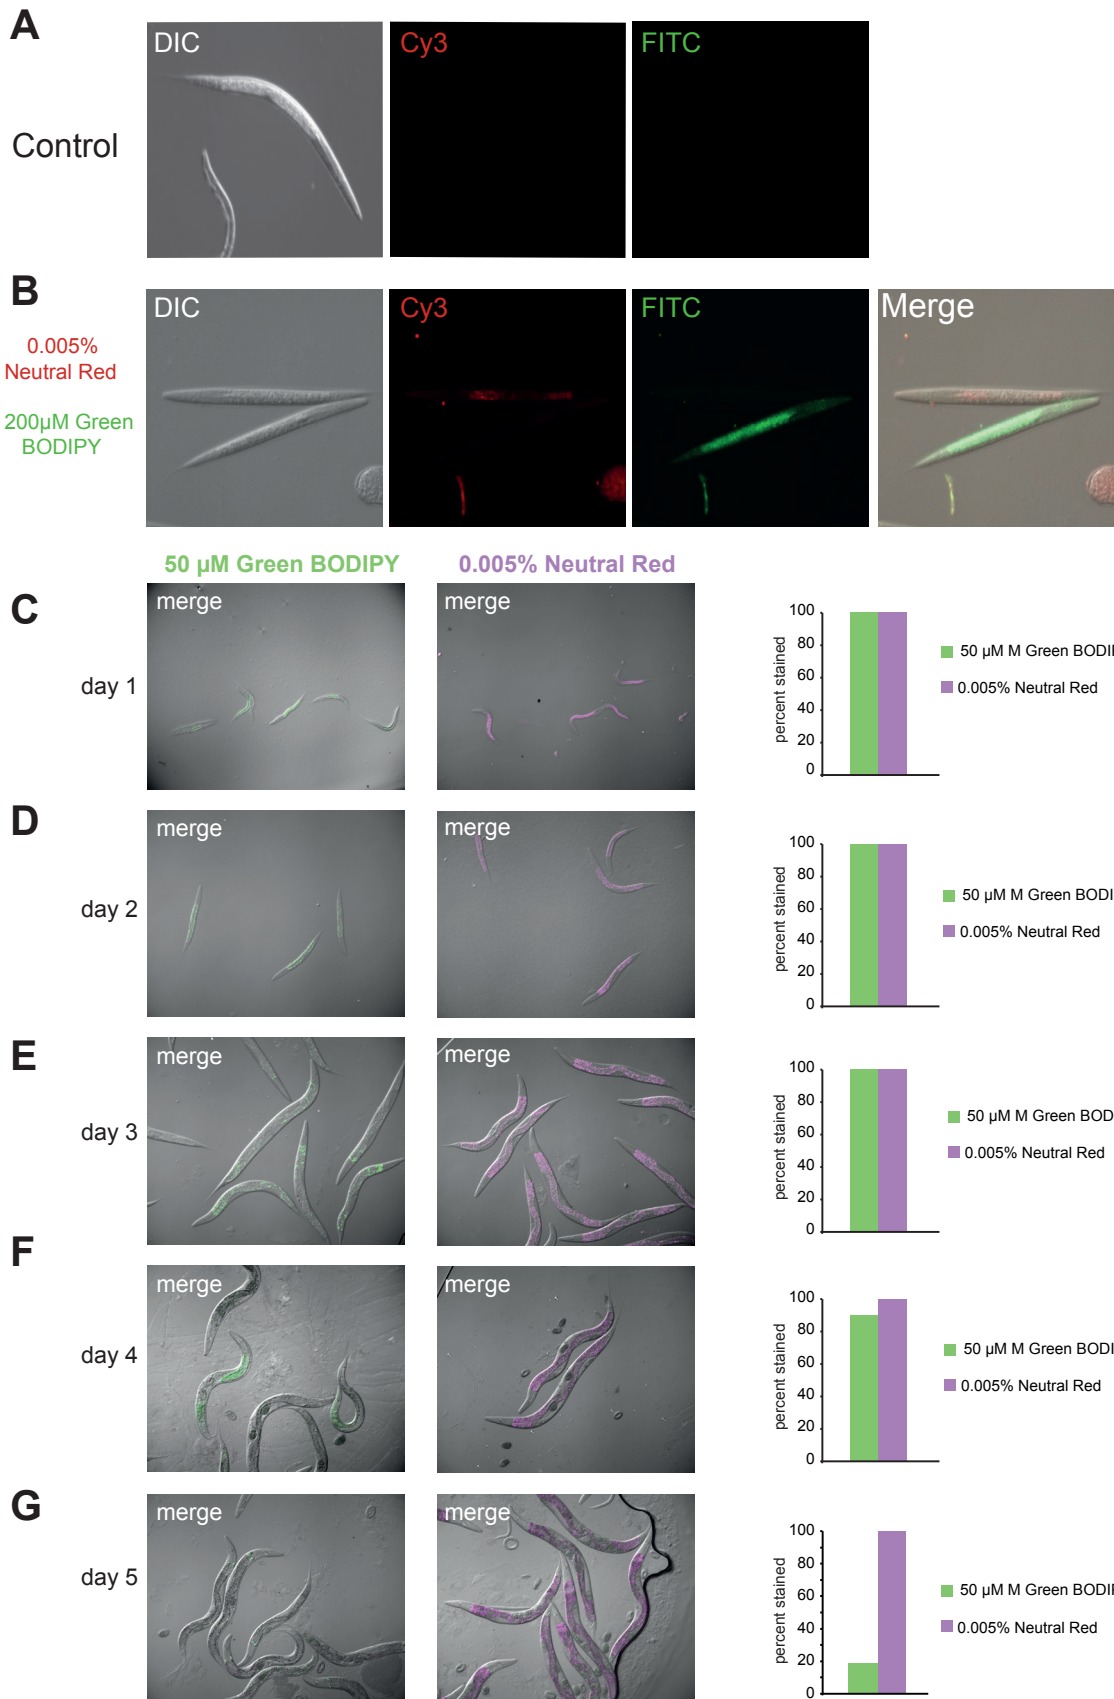

Figure S3, related to Figure 2. Vital dye staining of *Pristionchus pacificus* dauers, and duration of staining.

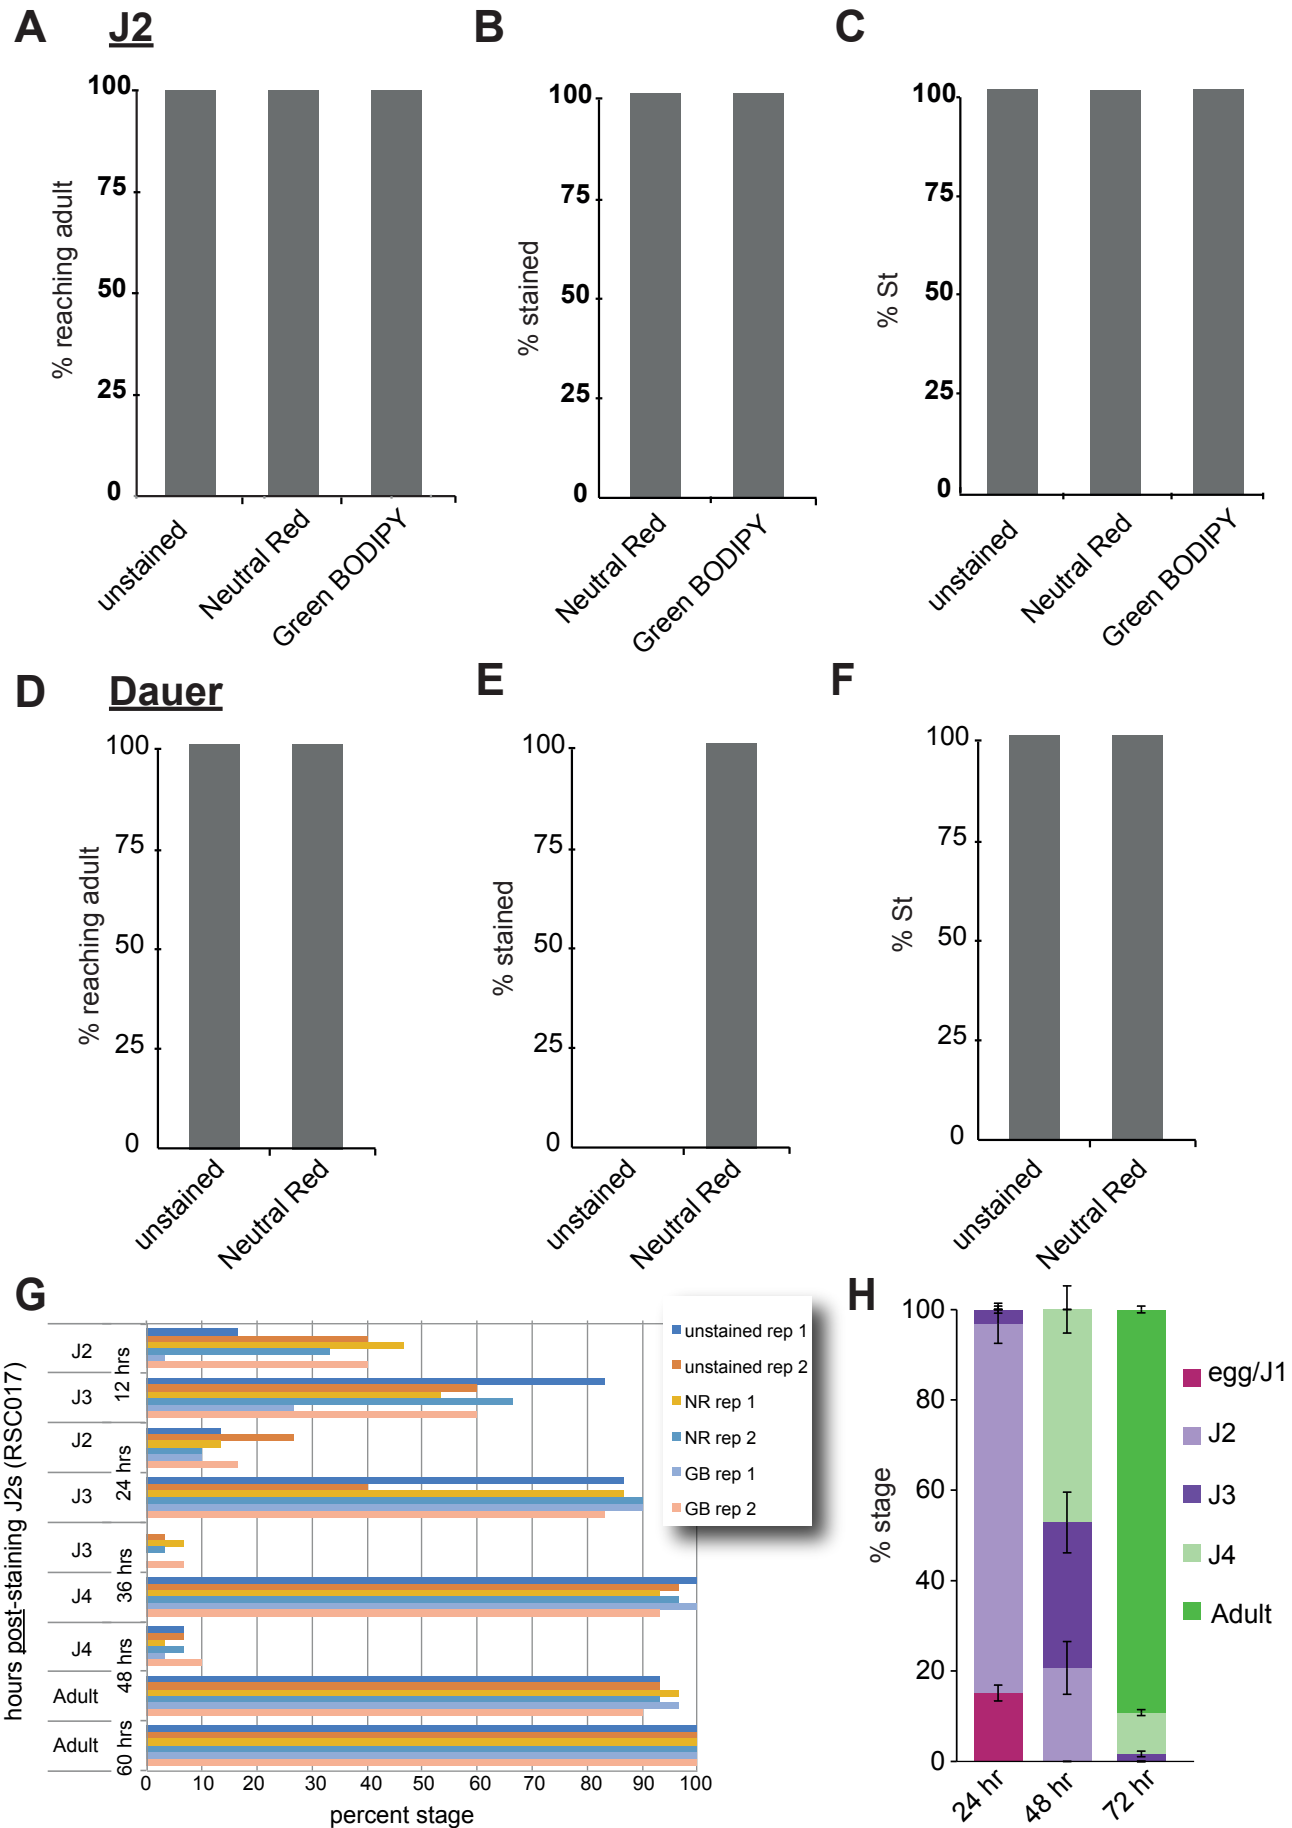

**Figure S4, related to Figure 2. Vital dye staining does not affect *P. pacificus* mouth form or development.**

**effect of population age on mouth  
form of developing juveniles**

| <b>binomial regression</b>                    | <b><i>p</i> value<br/>red-stained J2s</b> | <b><i>p</i> value<br/>red-stain dauers</b> |
|-----------------------------------------------|-------------------------------------------|--------------------------------------------|
| <b>stage added<br/>(adults vs. juveniles)</b> | 0.0132                                    | 0.002955                                   |
| <b>number added</b>                           | 4.28e-13                                  | 0.000404                                   |

**effect of number of peers on development and mouth form  
(proxy for potential starvation effects on mouth form)**

| <b>binomial regression</b> | <b><i>p</i> value for development<br/>(relative to 1,000)</b> | <b><i>p</i> value for Eu<br/>(relative to 1,000)</b> |
|----------------------------|---------------------------------------------------------------|------------------------------------------------------|
| <b>3,000 J2s added</b>     | 0.3408                                                        | 1.0                                                  |
| <b>4,000 J2s added</b>     | 0.0424                                                        | 1.0                                                  |
| <b>5,000 J2s added</b>     | 6.06E-14                                                      | 0.99                                                 |
| <b>10,000 J2s added</b>    | 4.09E-14                                                      | 0.99                                                 |

**Table S1, related to Figure 3. Table of binomial regression *p* values for vital-dye method and excess crowding.**



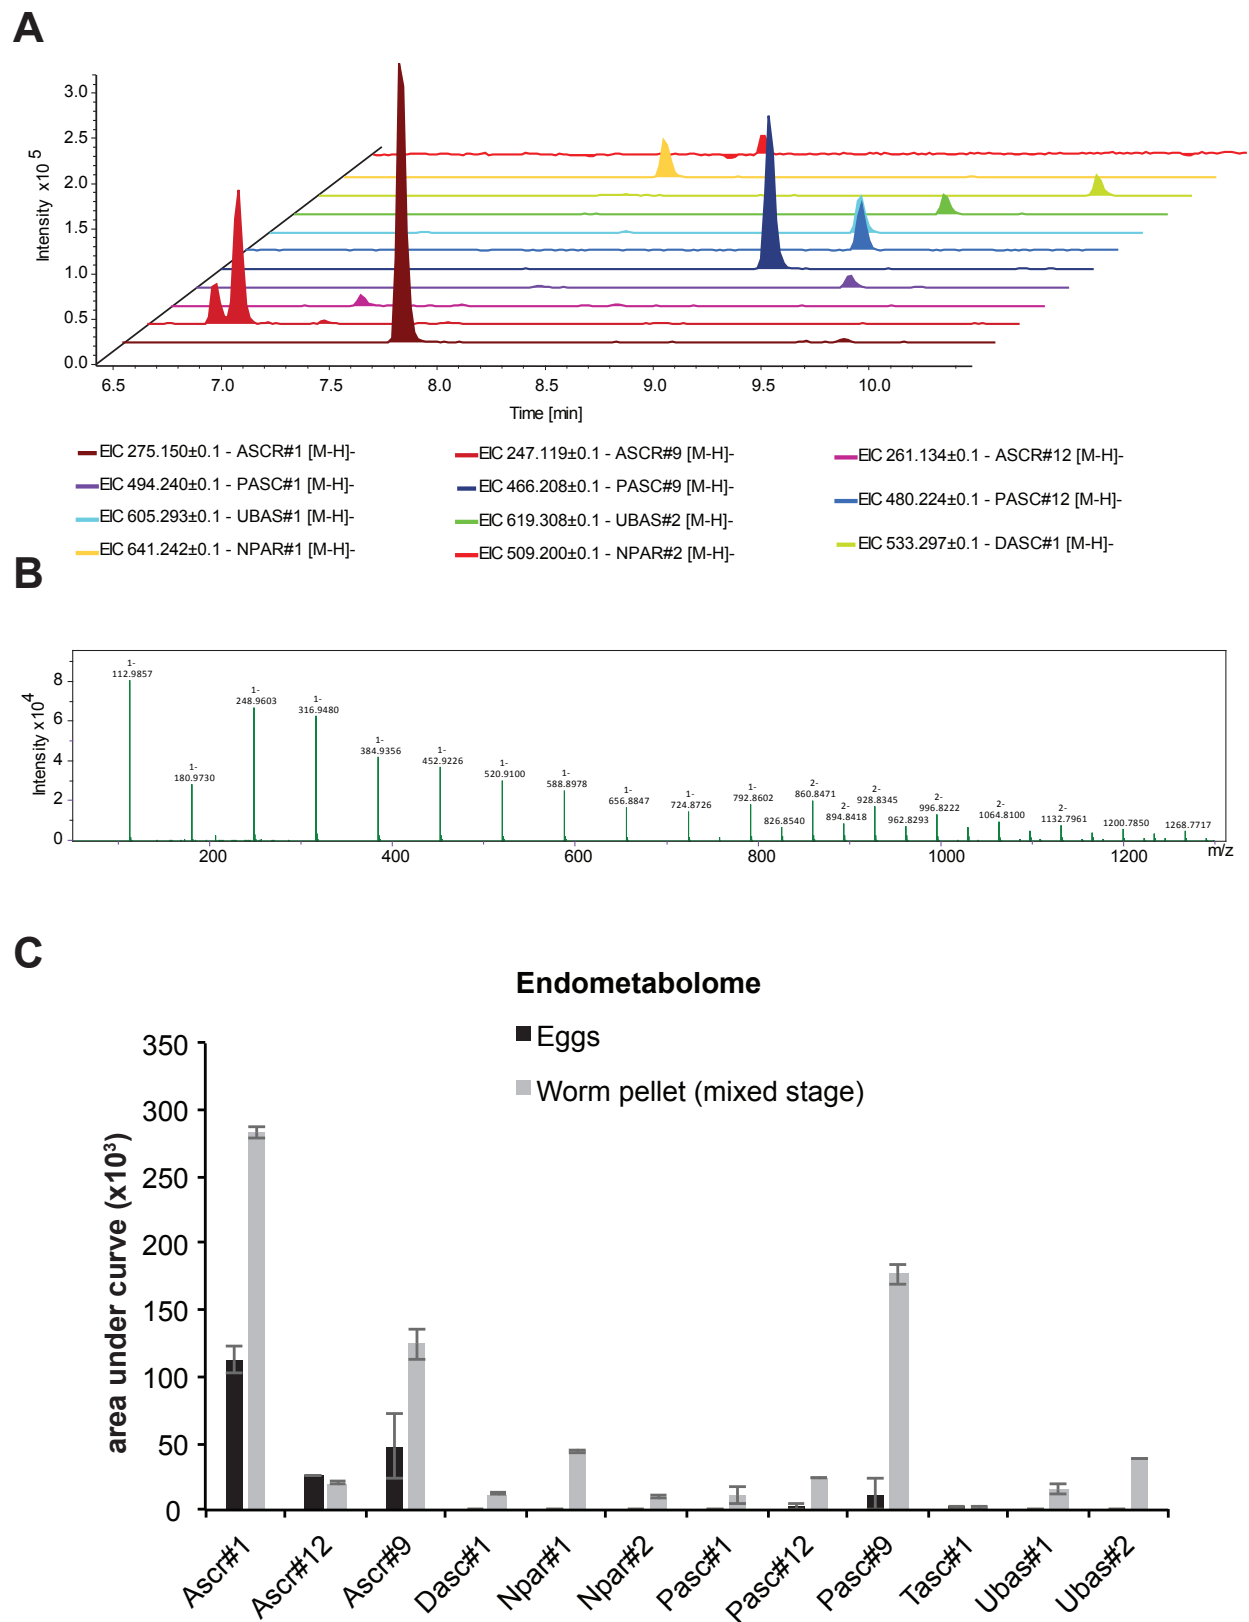

Figure S5, related to Figure 5. Pheromone profiling quality control

| <b>NDMM comparison</b> | <b>pvalue</b> | <b>fdr corrected</b> |
|------------------------|---------------|----------------------|
| ascr1_stage            | 0.4733        | 0.774490909          |
| ascr1_strain           | 0.0429        | 0.110314286          |
| ascr1_stage:strain     | 0.031         | 0.085846154          |
| ascr9_stage            | 3.79E-05      | 0.0002274            |
| ascr9_strain           | 0.651         | 0.778064516          |
| ascr9_stage:strain     | 0.272         | 0.50148              |
| ascr12_stage           | 0.0029        | 0.01404              |
| ascr12_strain          | 0.0897        | 0.201825             |
| ascr12_stage:strain    | 0.0302        | 0.085846154          |
| dasc1_stage            | 9.62E-08      | 8.66E-07             |
| dasc1_strain           | 0.11363       | 0.240628235          |
| dasc1_stage:strain     | 0.00351       | 0.01404              |
| npar1_stage            | 0.0033        | 0.01404              |
| npar1_strain           | 0.9426        | 0.984                |
| npar1_stage:strain     | 0.6355        | 0.778064516          |
| npar2_stage            | 0.0516        | 0.12384              |
| npar_2strain           | 0.984         | 0.984                |
| npar2_stage:strain     | 0.9716        | 0.984                |
| pasc1_stage            | 0.449         | 0.769714286          |
| pasc1_strain           | 0.753         | 0.847125             |
| pasc1_stage:strain     | 0.564         | 0.778064516          |
| pasc9_stage            | 0.616         | 0.778064516          |
| pasc9_strain           | 0.267         | 0.50148              |
| pasc9_stage:strain     | 0.523         | 0.778064516          |
| pasc12_stage           | 0.6122        | 0.778064516          |
| pasc12_strain          | 0.2786        | 0.50148              |
| pasc12_stage:strain    | 0.67          | 0.778064516          |
| tasc1_stage            | 0.522         | 0.778064516          |
| tasc1_strain           | 0.862         | 0.940363636          |
| tasc1_stage:strain     | 0.57          | 0.778064516          |
| ubas1_stage            | 3.13E-12      | 1.13E-10             |
| ubas1_strain           | 0.00538       | 0.019368             |
| ubas1_stage:strain     | 6.69E-08      | 8.03E-07             |
| ubas2_stage            | 1.34E-11      | 2.41E-10             |
| ubas2_strain           | 0.00711       | 0.023269091          |
| ubas2_stage:strain     | 6.18E-07      | 4.45E-06             |

**Table S2, related to Figure 5. Table of linear regression *p* values with *FDR* correction for strain and stage comparison of NDMM levels.**

|                           |          |          |          |
|---------------------------|----------|----------|----------|
| RS2333                    | dasc#1   | npar#1   | ascr#9   |
| 72 hrs compared to 24 hrs | 5.75E-07 | 3.47E-05 | 1.03E-04 |
| 72 hrs compared to 48 hrs | 5.71E-03 | 1.76E-01 | 1.97E-01 |
| RSC017                    | dasc#1   | npar#1   | ascr#9   |
| 72 hrs compared to 24 hrs | 2.55E-02 | 3.66E-03 | 2.03E-02 |
| 72 hrs compared to 48 hrs | 2.12E-01 | 3.66E-01 | 1.04E-01 |

**Volume normalized**

|                           |          |          |          |
|---------------------------|----------|----------|----------|
| RS2333                    | dasc#1   | npar#1   | ascr#9   |
| 72 hrs compared to 24 hrs | 5.75E-07 | 3.47E-05 | 1.02E-03 |
| 72 hrs compared to 48 hrs | 1.44E-02 | 2.92E-01 | 6.21E-01 |
| RSC017                    | dasc#1   | npar#1   | ascr#9   |
| 72 hrs compared to 24 hrs | 2.55E-02 | 3.66E-03 | 4.34E-02 |
| 72 hrs compared to 48 hrs | 2.71E-01 | 5.46E-01 | 1.70E-01 |

**Table S3, related to Figure 5. P values from pairwise comparison of dasc#1, npar#1, and ascr#9 throughout development.**

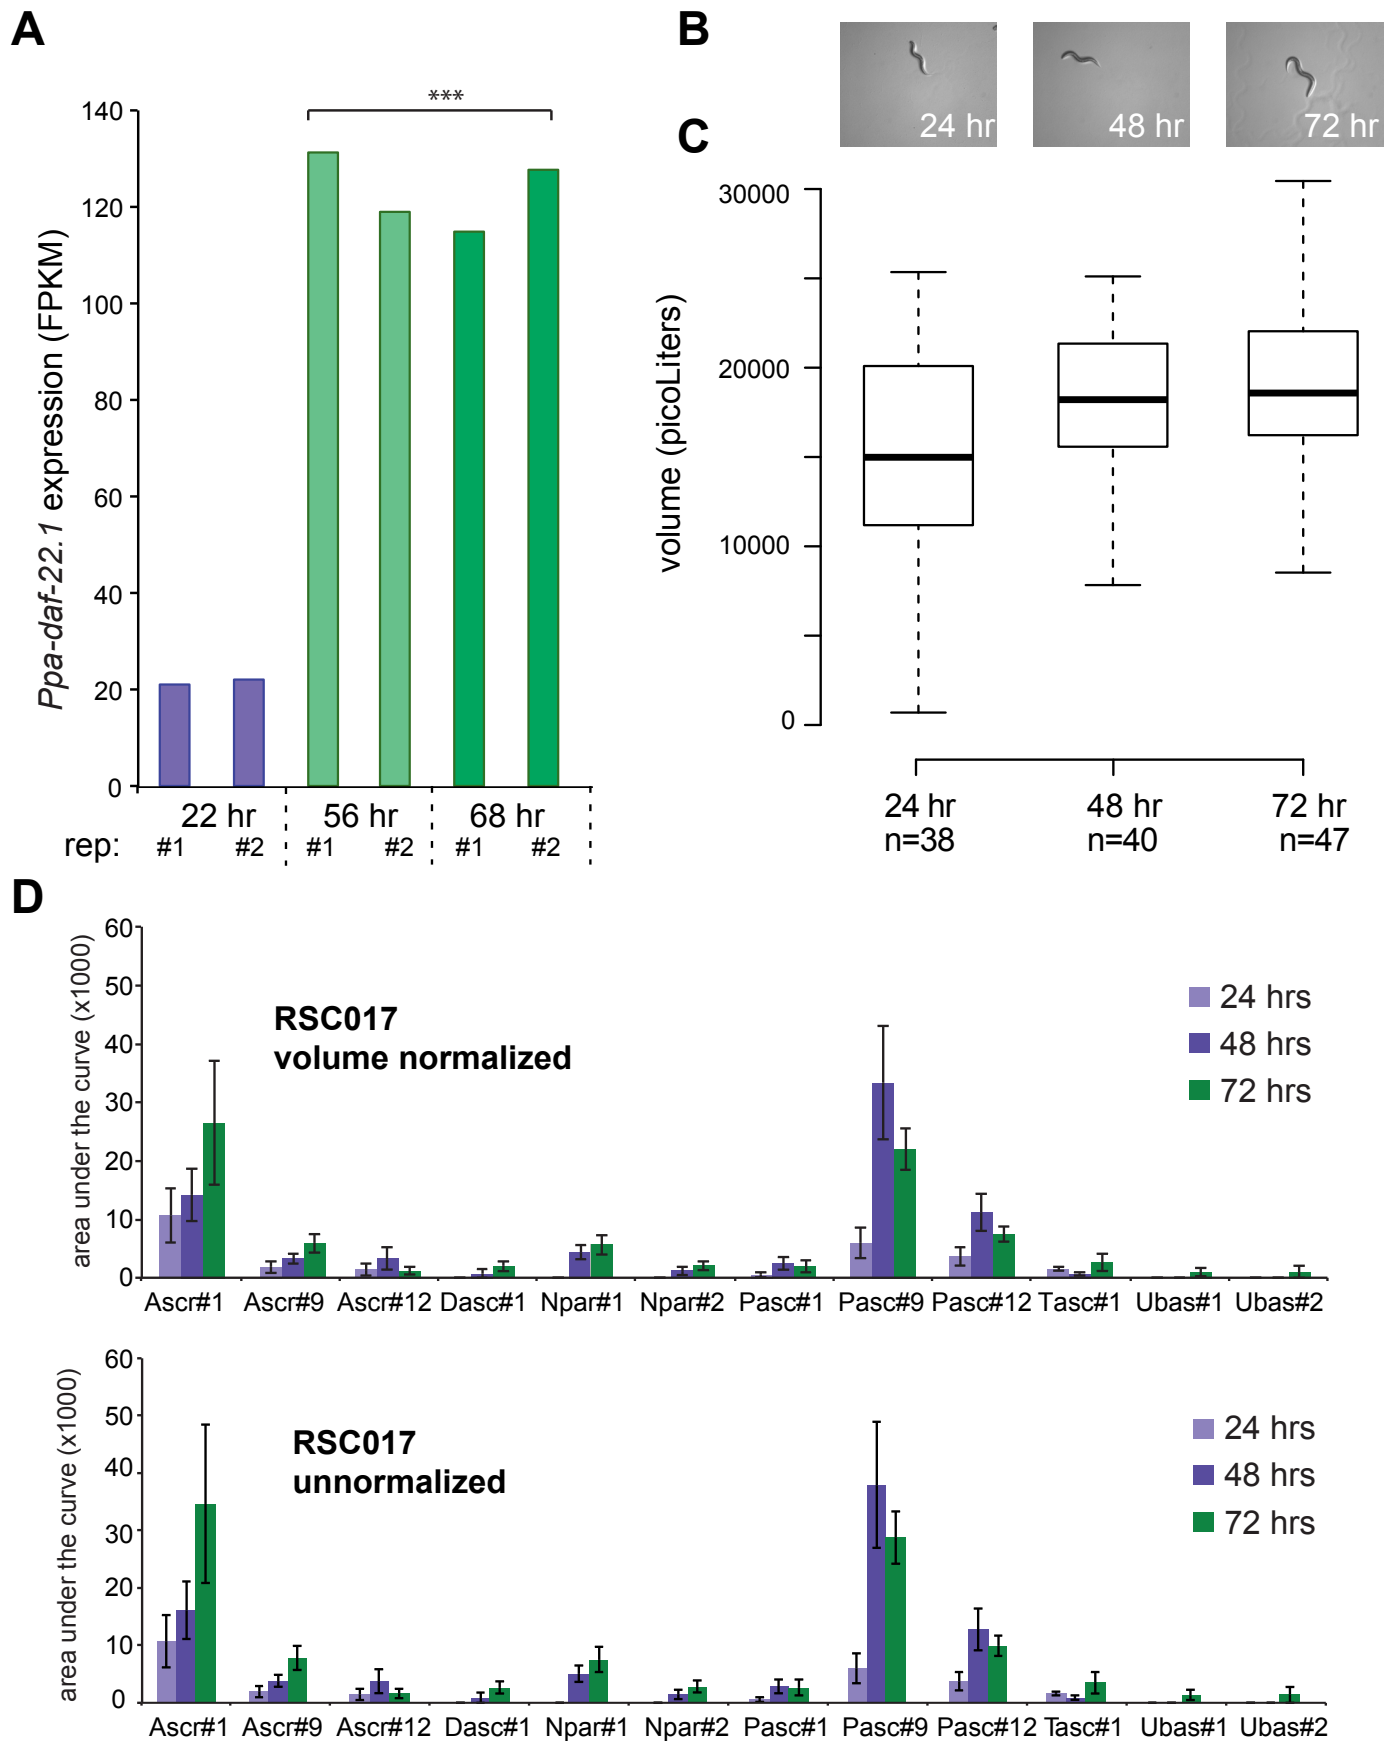

**Figure S6, related to Figure 5. Enzyme that synthesize NDMMs is transcriptionally regulated during development, and volume normalization of pheromones.**

| STAGE | DASC1  | NPAR1   | Pasc9   | Ascr1   | Ascr12  | Ascr9  | Npar2  | Pasc1   | Pasc12  | Tasc1  | Ubas1  | Ubas2 |
|-------|--------|---------|---------|---------|---------|--------|--------|---------|---------|--------|--------|-------|
| 24    | 0      | 0       | 0       | 0       | 0       | 0      | 0      | 0       | 0       | 1610   | 0      | 0     |
| 24    | 0      | 0       | 0       | 4489    | 0       | 0      | 0      | 0       | 0       | 1214   | 0      | 0     |
| 24    | 0      | 0       | 0       | 0       | 0       | 0      | 0      | 0       | 0       | 1769   | 0      | 0     |
| 24    | 0      | 0       | 0       | 22265   | 0       | 4301   | 0      | 0       | 0       | 1169.5 | 0      | 0     |
| 24    | 0      | 0       | 0       | 28319.5 | 0       | 5450   | 0      | 0       | 0       | 1871.5 | 0      | 0     |
| 24    | 0      | 0       | 7193.5  | 35197.5 | 8299.5  | 7177   | 0      | 0       | 9476    | 3918   | 0      | 0     |
| 24    | 0      | 0       | 16048.5 | 3929.5  | 5028.5  | 0      | 0      | 0       | 8318    | 969.5  | 0      | 0     |
| 24    | 0      | 0       | 19293.5 | 2386.5  | 0       | 0      | 0      | 1657.5  | 11094   | 999    | 0      | 0     |
| 24    | 0      | 0       | 11623.5 | 0       | 0       | 0      | 0      | 3667.5  | 4799.5  | 949.5  | 0      | 0     |
| 48    | 7800   | 8901    | 111298  | 7866    | 0       | 4250   | 6050   | 8486    | 35583.5 | 2827   | 0      | 0     |
| 48    | 0      | 8393    | 54479   | 7660    | 0       | 7077   | 5605   | 6699    | 19222.5 | 1047.5 | 0      | 0     |
| 48    | 0      | 10347   | 32381.5 | 11133   | 0       | 4339   | 0      | 6513    | 11901.5 | 2324   | 0      | 0     |
| 48    | 0      | 0       | 13819   | 34084   | 16659.5 | 5087   | 0      | 0       | 5916    | 1217   | 0      | 0     |
| 48    | 0      | 0       | 6893    | 40108   | 12167   | 7298   | 0      | 0       | 0       | 0      | 0      | 0     |
| 48    | 0      | 0       | 6766    | 32972   | 5415    | 6235.5 | 0      | 0       | 0       | 0      | 0      | 0     |
| 48    | 0      | 7635.5  | 56471.5 | 6725    | 0       | 0      | 1522   | 3957    | 17663.5 | 400.5  | 0      | 0     |
| 48    | 0      | 7036    | 29685.5 | 4781    | 0       | 0      | 0      | 0       | 13964.5 | 0      | 0      | 0     |
| 48    | 0      | 3205.5  | 29656   | 0       | 0       | 0      | 0      | 0       | 10977   | 0      | 0      | 0     |
| 72    | 0      | 16111.5 | 45664.5 | 9007    | 0       | 7593.5 | 5065   | 10394.5 | 17614.5 | 2243   | 0      | 12581 |
| 72    | 6321   | 9157.5  | 36161.5 | 7275    | 0       | 5649   | 5062   | 8322    | 13492   | 562.5  | 0      | 0     |
| 72    | 4475.5 | 17381   | 51388   | 7354.5  | 0       | 7472   | 7192   | 5269.5  | 12932   | 1192   | 0      | 0     |
| 72    | 7400.5 | 10075   | 25671   | 93903   | 6060    | 22877  | 6485   | 0       | 8342    | 12416  | 6377.5 | 0     |
| 72    | 0      | 0       | 9248.5  | 61584   | 3670.5  | 7879   | 0      | 0       | 0       | 14621  | 0      | 0     |
| 72    | 5861   | 0       | 13904   | 107297  | 4907.5  | 8875   | 0      | 0       | 5734    | 0      | 5697.5 | 0     |
| 72    | 0      | 0       | 20159.5 | 12767.5 | 0       | 0      | 0      | 0       | 9426    | 0      | 0      | 0     |
| 72    | 0      | 7294.5  | 28800   | 6249    | 0       | 3823   | 0      | 0       | 7802    | 544    | 0      | 0     |
| 72    | 0      | 7454.5  | 28094   | 6695.5  | 0       | 6082   | 1696.5 | 0       | 13884.5 | 201    | 0      | 0     |

### RSC017 pheromone levels

| STAGE | DASC1       | NPAR1       | Pasc9       | Ascr1       | Ascr12      | Ascr9       | Npar2       | Pasc1       | Pasc12      | Tasc1       | Ubas1       | Ubas2       |
|-------|-------------|-------------|-------------|-------------|-------------|-------------|-------------|-------------|-------------|-------------|-------------|-------------|
| 24    | 0           | 0           | 0           | 0           | 0           | 0           | 0           | 0           | 0           | 1610        | 0           | 0           |
| 24    | 0           | 0           | 0           | 4489        | 0           | 0           | 0           | 0           | 0           | 1214        | 0           | 0           |
| 24    | 0           | 0           | 0           | 0           | 0           | 0           | 0           | 0           | 0           | 1769        | 0           | 0           |
| 24    | 0           | 0           | 0           | 22265       | 0           | 4301        | 0           | 0           | 0           | 1169.5      | 0           | 0           |
| 24    | 0           | 0           | 0           | 28319.5     | 0           | 5450        | 0           | 0           | 0           | 1871.5      | 0           | 0           |
| 24    | 0           | 0           | 7193.5      | 35197.5     | 8299.5      | 7177        | 0           | 0           | 9476        | 3918        | 0           | 0           |
| 24    | 0           | 0           | 16048.5     | 3929.5      | 5028.5      | 0           | 0           | 0           | 8318        | 969.5       | 0           | 0           |
| 24    | 0           | 0           | 19293.5     | 2386.5      | 0           | 0           | 0           | 1657.5      | 11094       | 999         | 0           | 0           |
| 24    | 0           | 0           | 11623.5     | 0           | 0           | 0           | 0           | 3667.5      | 4799.5      | 949.5       | 0           | 0           |
| 48    | 6859.790284 | 7828.076066 | 97882.17167 | 6917.834663 | 0           | 3737.706244 | 5320.734771 | 7463.100045 | 31294.27533 | 2486.234248 | 0           | 0           |
| 48    | 0           | 7381.310238 | 47912.11729 | 6736.665843 | 0           | 6223.940492 | 4929.374941 | 5891.504502 | 16905.42548 | 921.2346567 | 0           | 0           |
| 48    | 0           | 9099.77565  | 28478.24347 | 9791.03144  | 0           | 3815.97821  | 0           | 5727.924887 | 10466.89667 | 2043.86572  | 0           | 0           |
| 48    | 0           | 0           | 12153.26179 | 29975.52462 | 14651.36875 | 4473.81451  | 0           | 0           | 5202.887092 | 1070.303176 | 0           | 0           |
| 48    | 0           | 0           | 6062.119798 | 35273.39342 | 10700.39338 | 6418.301217 | 0           | 0           | 0           | 0           | 0           | 0           |
| 48    | 0           | 0           | 5950.428341 | 28997.56477 | 4762.277486 | 5483.874656 | 0           | 0           | 0           | 0           | 0           | 0           |
| 48    | 0           | 6715.119066 | 49664.44193 | 5914.370469 | 0           | 0           | 1338.538566 | 3480.024379 | 15534.34688 | 352.2238473 | 0           | 0           |
| 48    | 0           | 6187.88262  | 26107.21852 | 4204.69966  | 0           | 0           | 0           | 0           | 12281.22326 | 0           | 0           | 0           |
| 48    | 0           | 2819.109969 | 26081.27444 | 0           | 0           | 0           | 0           | 0           | 9653.835634 | 0           | 0           | 0           |
| 72    | 0           | 12340.85154 | 34977.427   | 6899.050356 | 0           | 5816.358263 | 3879.61475  | 7961.827348 | 13492.09753 | 1718.060392 | 0           | 9636.610695 |
| 72    | 4841.667292 | 7014.328149 | 27698.45781 | 5572.398284 | 0           | 4326.938544 | 3877.316854 | 6374.364057 | 10334.40517 | 430.8555374 | 0           | 0           |
| 72    | 3428.078147 | 13313.24461 | 39361.42997 | 5633.292533 | 0           | 5723.293467 | 5508.823155 | 4036.254674 | 9905.46455  | 913.0307566 | 0           | 0           |
| 72    | 5668.526941 | 7717.101403 | 19663.09778 | 71926.44894 | 4641.750323 | 17522.99045 | 4967.285618 | 0           | 6389.683365 | 9510.226404 | 4884.944337 | 0           |
| 72    | 0           | 0           | 7084.031    | 47171.21318 | 2811.476    | 6035.041385 | 0           | 0           | 0           | 11199.18011 | 0           | 0           |
| 72    | 4489.323208 | 0           | 10649.98292 | 82185.7895  | 3758.9752   | 6797.942923 | 0           | 0           | 4392.045603 | 0           | 4364.087865 | 0           |
| 72    | 0           | 0           | 15441.47948 | 9779.463242 | 0           | 0           | 0           | 0           | 7219.989859 | 0           | 0           | 0           |
| 72    | 0           | 5587.334609 | 22059.80351 | 4786.517783 | 0           | 2928.285723 | 0           | 0           | 5976.062049 | 416.6851775 | 0           | 0           |
| 72    | 0           | 5709.889073 | 21519.03194 | 5128.521334 | 0           | 4658.601562 | 1299.460301 | 0           | 10635.04659 | 153.9590454 | 0           | 0           |

### RSC017 volume normalized pheromone levels

Table S4, related to Figure 5. Raw and normalized data of RSC017 pheromones, in absolute value of area under the curve.
